# Supplementary material for: Fabricating a sustained releaser of heparin using SBA-15 mesoporous silica
Source: Royal Society of Chemistry journal article supplement (doi:10.1039/c3tb21092h), 2013-10-17
Supplement: c3tb21092h.pdf [file c3tb21092h.pdf]

## Electronic Supporting Information

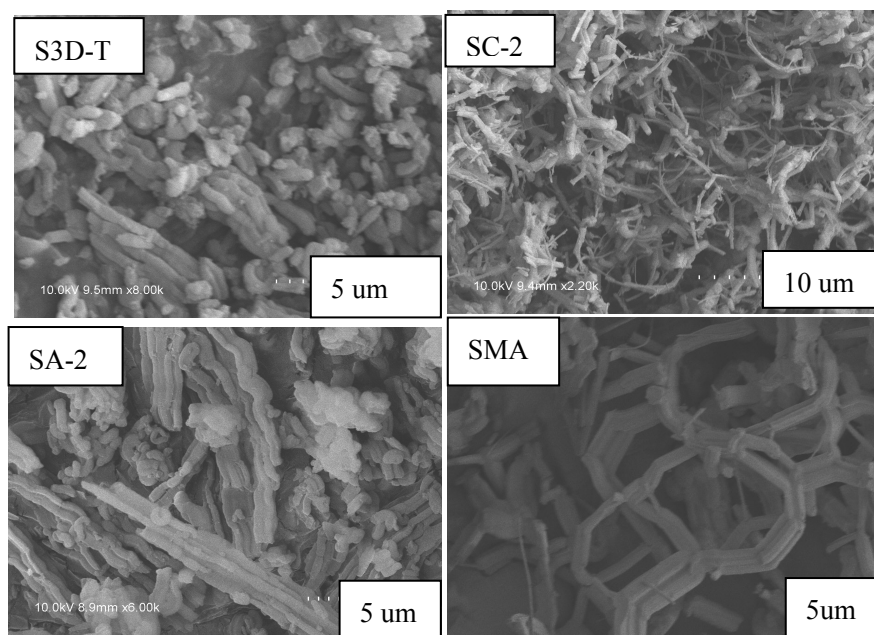

**Figure S1.** The SEM images of SBA-15 analogues samples.

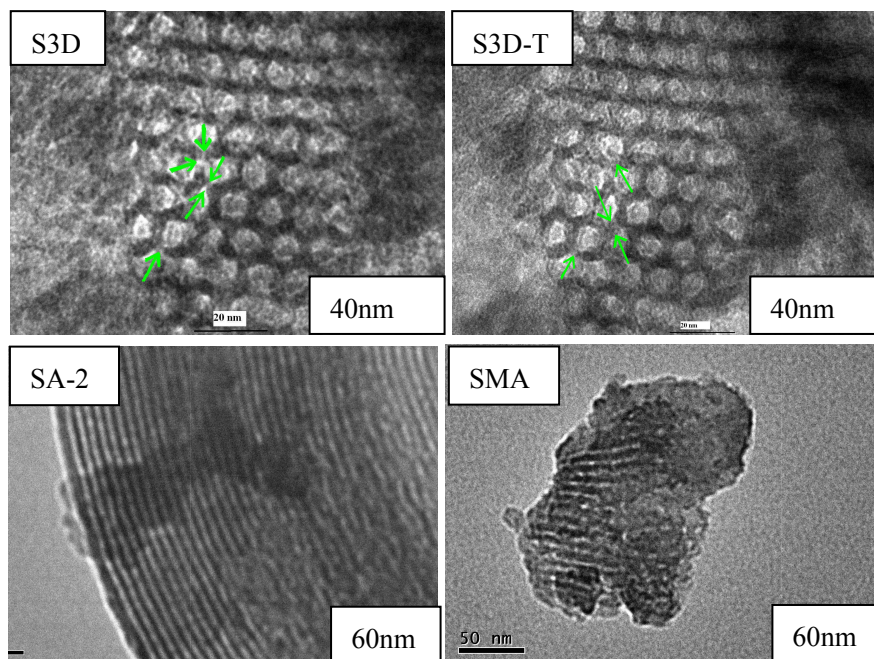

**Figure S2.** The TEM images of SBA-15 series samples.

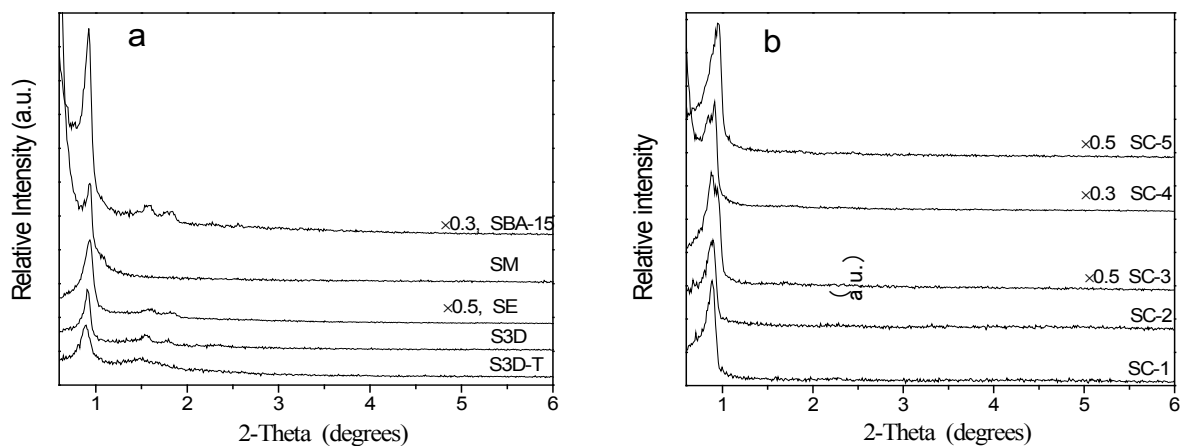

**Figure S3.** Low-angle XRD patterns of (a) SBA-15 with different morphologies, and (b) carbonized SM (SC-n) samples.

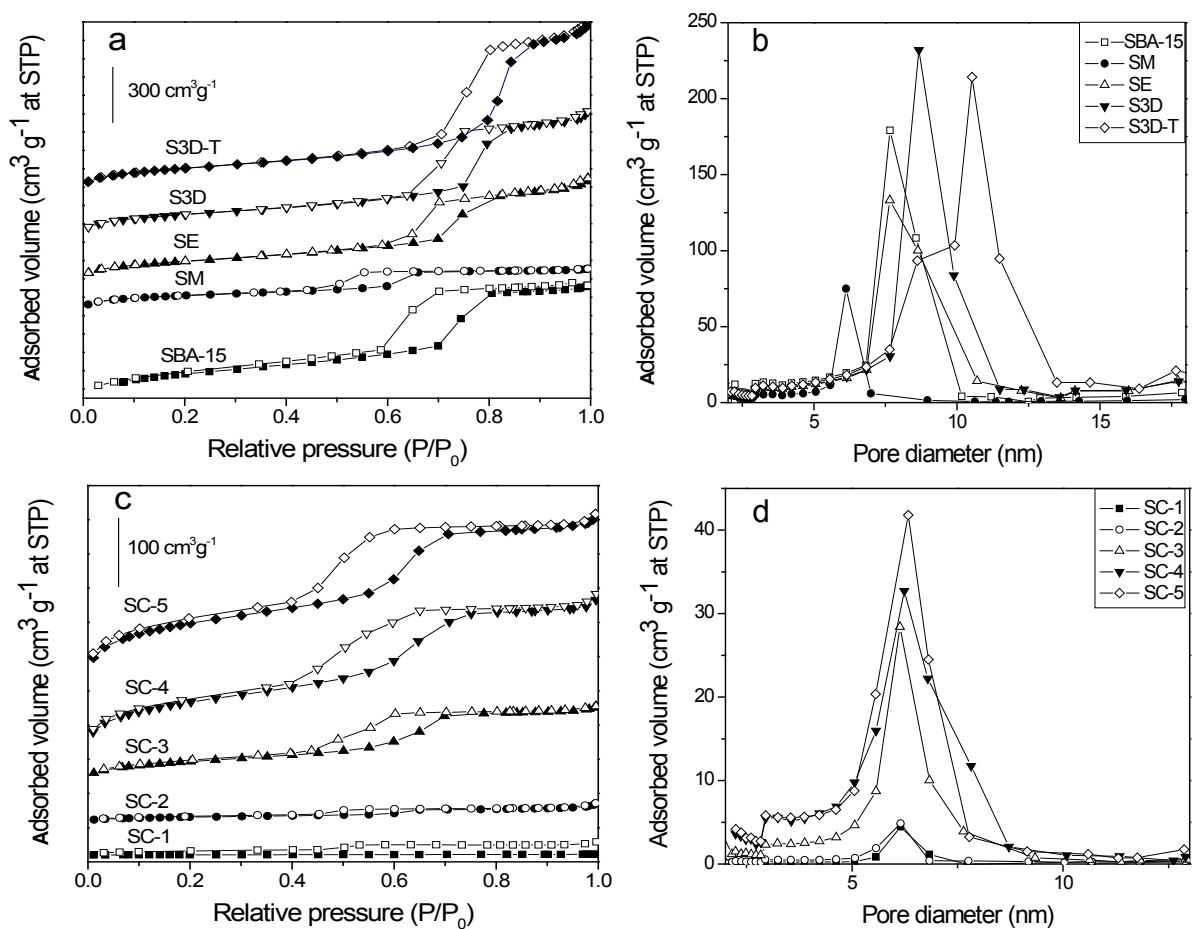

**Figure S4.** The N<sub>2</sub> adsorption–desorption isotherms (a, c) and pore size distribution (b, d) of SBA-15 sample with different morphologies (a, b), carbonized SM (SC-n) samples (c, d).

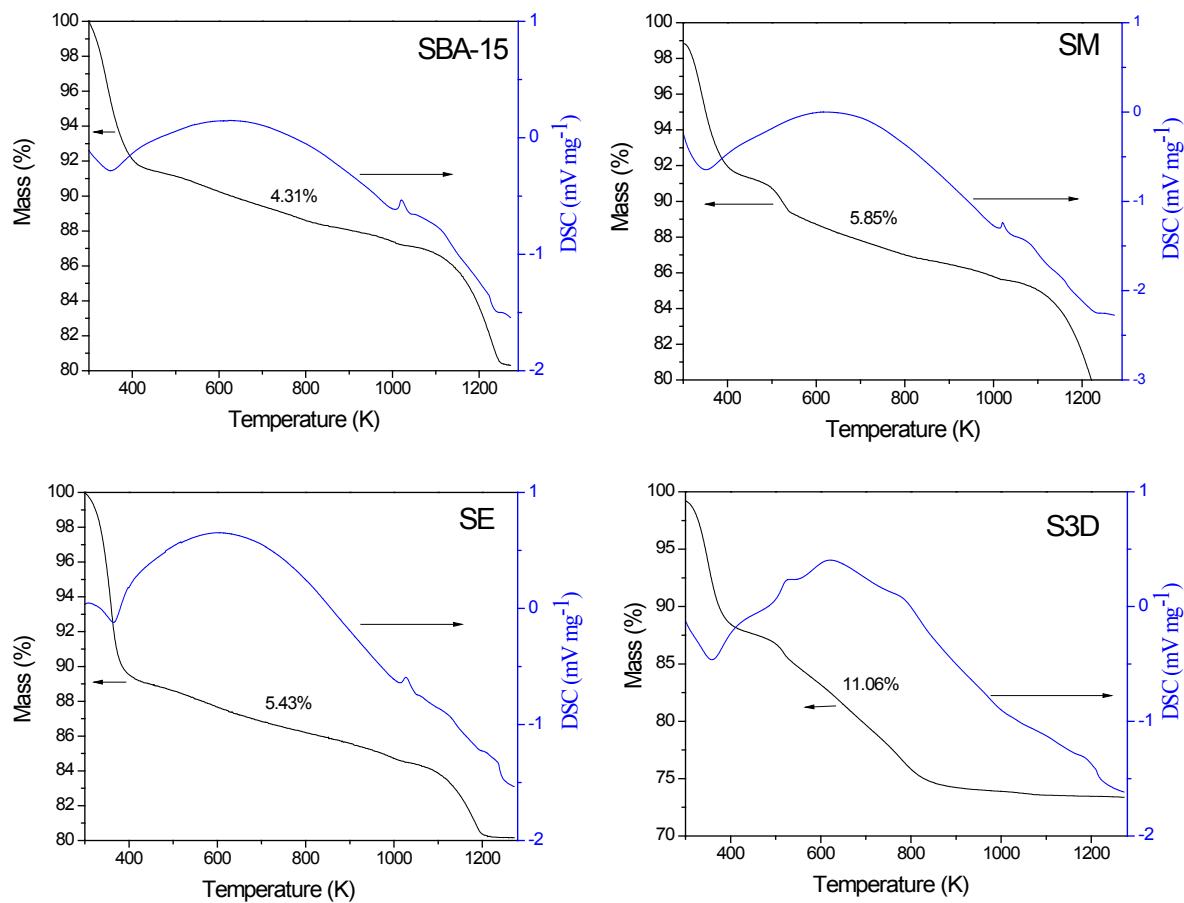

Figure S5. TG-DSC measurements of samples SBA-15 containing heparin.
